# Supplementary material
Source: PubMed Central journal article supplement (PMC4111975)
Supplement: NIHMS579958-supplement-01.pdf [file NIHMS579958-supplement-01.pdf]

## Supplementary Table - Castellano

DNA Sequence of *Kiss1* and *Golt1a* transcripts found in rat placenta

### Golt1a Rat Placenta (Ensembl: Rnor\_5.0: Chromosome 13)

| Exon / Intron | Start      | End        | Length | Sequence                                                                                                                                                                                                                                                                                                                                                                                                                                                                                                                                                                                           |
|---------------|------------|------------|--------|----------------------------------------------------------------------------------------------------------------------------------------------------------------------------------------------------------------------------------------------------------------------------------------------------------------------------------------------------------------------------------------------------------------------------------------------------------------------------------------------------------------------------------------------------------------------------------------------------|
| Exon 1        | 55,602,891 | 55,602,771 | 121    | ACTGTTGCCAAGGGTCAGCTTCTGGGAACATGCCCAGGATCCTCTGGGCTCTTTCTAG<br>ACAGCTGACCAGGAAGGCCCCCCAGTGGACTGAAGCATGATCTCCATCACAGAGTGGCAG<br>A                                                                                                                                                                                                                                                                                                                                                                                                                                                                    |
| Intron 1-2    | 55,602,770 | 55,592,921 | 9,850  | gtgagtggaatgaatggccggtggt.....ttcaggctctccttacctttggcag                                                                                                                                                                                                                                                                                                                                                                                                                                                                                                                                            |
| Exon 2        | 55,592,920 | 55,592,829 | 92     | AAATTGGCGTGGGCATCACCGGCTTCGGCGTCTTCTTCATCCTCTTTGGGATACTCTTGT<br>ACTTCGATTCCGTGCTCTTGGCTTTTGGAAAC                                                                                                                                                                                                                                                                                                                                                                                                                                                                                                   |
| Intron 2-3    | 55,592,828 | 55,592,060 | 769    | gtgagtcctccgacactaggtacct.....catcctcatttcctgggcctgcag                                                                                                                                                                                                                                                                                                                                                                                                                                                                                                                                             |
| Exon 3        | 55,592,059 | 55,591,881 | 179    | CTGCTGTTCTGACTGGCCTCTCCCTCATCATCGGCCTGAGGAGAACGTTTTCTTCTTC<br>TTCCAACGGCACAAGCTCAAGGGAACAAGCTTCTTCTGGCGGTGTGCCATTGTGCTG<br>CTGCGCTGGCCCCTGCTAGGCATGCTCTTGGAGGCCTATGGGTTCTGTTAGCCTCTTCAA                                                                                                                                                                                                                                                                                                                                                                                                            |
| Intron 3-4    | 55,591,880 | 55,591,136 | 745    | gtgagtaccattttcctcagtctca.....cccctgtcctctcttctattcctag                                                                                                                                                                                                                                                                                                                                                                                                                                                                                                                                            |
| Exon 4        | 55,591,135 | 55,591,072 | 64     | GGGGTTTTTCCCTGTAGTCTTTGGCTTCCTGGGCAATGCATTTAACATCCCCTTCCTGAG<br>CGCA                                                                                                                                                                                                                                                                                                                                                                                                                                                                                                                               |
| Intron 4-5    | 55,591,071 | 55,590,481 | 591    | gtaagtaggtggggcttgtgcttag.....gaataatgactcttgtttctcacag                                                                                                                                                                                                                                                                                                                                                                                                                                                                                                                                            |
| Exon 5        | 55,590,480 | 55,590,425 | 55     | CTGTTCCAGAGGCTTCAAGGCTCCTCCAGCTCAATGGTCTGA <b>ACTGCCACCCCG</b>                                                                                                                                                                                                                                                                                                                                                                                                                                                                                                                                     |
| Intron 5-6    | 55,590,424 | 55,582,750 | 7674   | gtgagctccttgaattcggattgtt.....ctcactcctctgtactctgtcctag                                                                                                                                                                                                                                                                                                                                                                                                                                                                                                                                            |
| Exon 6        | 55,582,749 | 55,582,203 | 546    | GCCAACAGTCCGGACCCCAGGAACTCGTTAATGCCTGGCAAAGGGCCCGCGGTATGCAG<br>AGAGCAAGCCTGGGGCTGCAGGACTGCGCGCTCGCCGAACATCGCCATGCCCGCCGGTGG<br>AGAACCCACGGGGCACCAGCGGCCCCCGTGTGCCACCCGAGTCGCCTGATCCCTGCGC<br>CCCGCGGATCGGTGCTGGTGCAGCGCGAGAAGGACATGTCAGCCTACAACCTGGAACCTCT<br>TTGGCCTGCGCTACGGCAGGAGGCAGGTGGCGCGGGCGGCACGGGGCTGAGTGCAGGGTT<br>GCAGGTGGATTGCAGCCCACCCATGGCAGAGGCCAAGGCAGGGAGCTTCTAGACTTGTG<br>CAATAAAAGCAATGCTGTGCGCTTACCCTGTGTGATTTTTCCCGGAATCTGCGGGCAGT<br>GCAGAGAGGGCAGATCCTCTTCTCCCTTAGTTGCCTCTTCTCTGATTTCAAGATGTCTCT<br>GGTGCCAAAATCGGTACTTTTTAAATTACTAGTTAAGGAAGGACCCGGCTGTTGCCCCGG<br>CTATTG |

**Kiss1 Rat Placenta (Ensembl: Rnor\_5.0: Chromosome 13)**

| Exon / Intron | Start      | End        | Length | Sequence                                                                                                                                                                                                                                                                                                                                                                                                                                                                                                                                                                                       |
|---------------|------------|------------|--------|------------------------------------------------------------------------------------------------------------------------------------------------------------------------------------------------------------------------------------------------------------------------------------------------------------------------------------------------------------------------------------------------------------------------------------------------------------------------------------------------------------------------------------------------------------------------------------------------|
| Exon 1        | 55,585,008 | 55,584,860 | 149    | TCTTCGTCTCAGCCTCTGGACACCCTGTGGATCTGCCTCTTCCAGAAATGATCTCGCTGGC<br>TTCTTGGCAGCTGCTGCTTCTCCTCTGTGTGGCCTCTTTTGGGGAGCCACTGGCAAAAAT<br>GGCACCTGTGGTGAACCCTGAACCCACAG                                                                                                                                                                                                                                                                                                                                                                                                                                 |
| Intron 1-2    | 55,584,859 | 55,582,750 | 2,110  | gtacacaccatcccggaaaaggggg.....ctcactcctctgtactctgtcctag                                                                                                                                                                                                                                                                                                                                                                                                                                                                                                                                        |
| Exon 2        | 55,582,749 | 55,582,203 | 546    | GCCAACAGTCCGGACCCCAGGAACTCGTTAATGCCCTGGCAAAGGGCCCGCGGTATGCAG<br>AGAGCAAGCCTGGGGCTGCAGGACTGCGCGCTCGCCGAACATCGCCATGCCCGCCGGTGG<br>AGAACCCACGGGGCACCAGCGCCCCCGTGTGCCACCCGAGTCGCCATGCCCTGCGC<br>CCCGCGGATCGGTGCTGGTGCAGCGGAGAAGGACATGTCAGCCTACAACGGAACTCCT<br>TTGGCCTGCGCTACGGCAGGAGGCAGGTGGCGCGGGCGGCACGGGGCTGAGTGCAGGGTT<br>GCAGGTGGATTGCAGCCCACCCATGGCAGAGGCCAAGGCAGGGAGCTTCTAGACTTGTG<br>CAATAAAAGCAATGCTGTGCGCTTACCGTGTGTGATTTTTCCCGGAATCTGCGGGCAGT<br>GCAGAGAGGGCAGATCCTCTTCTCCCTTAGTTGCCTCTTCTCTGATTTCAAGATGTCTCT<br>GGTGCCAAAATCGGTACTTTTTAAATTACTAGTTAAGGAAGGACCCGGCTGTTGCCCCGG<br>CTATTG |

Relative positions of the transcripts are referred to Ensembl: Rnor\_5.0: Chromosome 13. In purple are untranslated regions, in blue the introns and in black the coding regions.
